# Supplementary figures and images for: Engineered IscB–ωRNA system with expanded target range for base editing
Source: PubMed Central journal article supplement — Nat Chem Biol. 2024 Aug 15;21(1):100–8. doi: 10.1038/s41589-024-01706-1 (PMC11666462; doi:10.1038/s41589-024-01706-1), 2024-08-15

Uncropped and unprocessed scans for Fig.5h

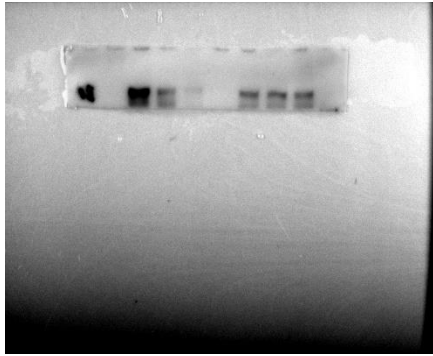

V1\_Dys

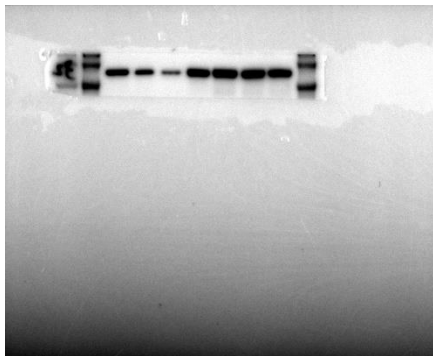

V1\_Vinculin

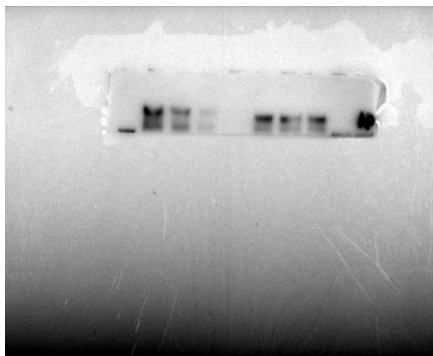

V2\_Dys

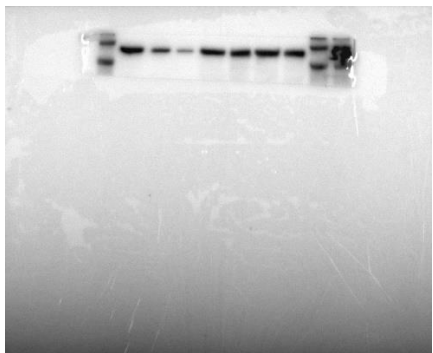

V2\_Vinculin

Supplement: 41589_2024_1706_MOESM10_ESM.pdf [file 41589_2024_1706_MOESM10_ESM.pdf]
